# Supplementary material for: Sphingolipids as a new factor in the pathomechanism of preeclampsia – Mass spectrometry analysis
Source: PLoS One. 2017 May 19;12(5):e0177601. doi: 10.1371/journal.pone.0177601 (PMC5438119; doi:10.1371/journal.pone.0177601)
Supplement: S2 File — (XLSX) [file pone.0177601.s002.xlsx]

## Sheet: ANOVA__OSOCZE__OGR
S2 File - ANOVA analysis of results in plasma.
plasma		results in ng/100ul (in manuscript results are postcalculated to nmol/L)
	SPA*	Sph*	S1P*	C24.Cer	C20.Cer*	C18.Cer*	C16.Cer	C14.Cer*	C18.1.Cer	C22.Cer	C24.1.Cer
P-value	0.334676	0.00327271	0.0289381	0.579531	6.57861e-05	6.57861e-05	0.012082	0.579531	0.00303088	0.00717991	0.00852947
	SPA	Sph	S1P	C24.Cer	C20.Cer	C18.Cer	C16.Cer	C14.Cer	C18.1.Cer	C22.Cer	C24.1.Cer
Min Total	0.377598	1.55318	2.15886	38.5125	5.27799	3.6422	22.376	0.553861	0.50703	18.2446	66.997
0	0.377598	1.55318	2.15886	48.177	5.58132	3.6422	23.9942	0.553861	0.50703	23.4267	66.997
1	0.454733	2.39689	3.42628	38.5125	5.27799	6.62175	22.376	0.562766	0.539333	18.2446	95.2162
	SPA	Sph	S1P	C24.Cer	C20.Cer	C18.Cer	C16.Cer	C14.Cer	C18.1.Cer	C22.Cer	C24.1.Cer
Max Total	3.5378	19.7482	28.4047	255.708	20.2058	16.1657	66.1644	1.87494	1.56116	113.11	232.301
0	3.5378	10.9127	14.5759	241.066	15.5157	16.1657	58.5896	1.87494	1.52846	107.012	216.76
1	2.33583	19.7482	28.4047	255.708	20.2058	15.8849	66.1644	1.61483	1.56116	113.11	232.301
	SPA	Sph	S1P	C24.Cer	C20.Cer	C18.Cer	C16.Cer	C14.Cer	C18.1.Cer	C22.Cer	C24.1.Cer
Mean Total	1.13495	4.75292	8.00513	145.143	11.0108	8.81666	38.6314	1.06102	1.03097	62.3396	132.878
0	1.09621	3.87085	6.69707	142.33	9.61583	7.6087	36.2979	1.05215	0.935236	55.8139	122.09
1	1.20136	6.26505	10.2475	149.964	13.4022	10.8875	42.6319	1.0758	1.19054	73.5266	151.373
	SPA	Sph	S1P	C24.Cer	C20.Cer	C18.Cer	C16.Cer	C14.Cer	C18.1.Cer	C22.Cer	C24.1.Cer
Median Total	1.01159	4.04653	6.56215	143.389	11.0063	8.58914	38.6089	1.00686	1.01164	59.3634	131.647
0	0.942388	3.42894	6.03502	143.396	8.80741	7.11688	35.5833	0.959161	0.877812	54.4562	114.699
1	1.13636	4.74361	7.65522	142.987	12.9273	10.5088	41.7795	1.02707	1.26464	74.5137	145.622
	SPA	Sph	S1P	C24.Cer	C20.Cer	C18.Cer	C16.Cer	C14.Cer	C18.1.Cer	C22.Cer	C24.1.Cer
StdErr Total	0.0732711	0.395967	0.659697	6.07877	0.432961	0.394225	1.09362	0.0427912	0.0378699	2.70165	4.87955
0	0.0981928	0.305116	0.514502	6.97642	0.39279	0.425456	1.18333	0.0565724	0.0434082	2.6917	5.43753
1	0.107364	0.855162	1.45441	11.5317	0.713491	0.546466	1.90313	0.0658987	0.0560476	4.88146	8.0732
0	control group
1	study group
