# Supplementary material for: Sphingolipids as a new factor in the pathomechanism of preeclampsia – Mass spectrometry analysis
Source: PLoS One. 2017 May 19;12(5):e0177601. doi: 10.1371/journal.pone.0177601 (PMC5438119; doi:10.1371/journal.pone.0177601)
Supplement: S4 File — (XLSX) [file pone.0177601.s004.xlsx]

## Sheet: ANOVA__OSOCZE_FR
S4 File - ANOVA analysis of results in plasma fraction.
plasma fraction		results from ng/mg TP (in manuscript results are postcalculated to nmol/mgTP
	SPA	Sph	S1P*	C24.Cer	C20.Cer*	C18.Cer	C16.Cer	C14.Cer*	C18.1.Cer	C22.Cer*	C24.1.Cer*
P-value	0.474511	0.382	0.682954	0.414743	0.914475	0.680527	0.634372	0.234007	0.724108	0.880478	0.813179
	SPA	Sph	S1P	C24.Cer	C20.Cer	C18.Cer	C16.Cer	C14.Cer	C18.1.Cer	C22.Cer	C24.1.Cer
Min Total	0.0570589	0.195337	0.655917	3.15541	0.416674	0.335568	2.55871	0.0545013	0.0438609	1.66092	8.07246
0	0.065592	0.255632	0.821827	9.39246	0.750466	0.555672	2.7099	0.0616537	0.0552287	3.53429	8.72042
1	0.0570589	0.195337	0.655917	3.15541	0.416674	0.335568	2.55871	0.0545013	0.0438609	1.66092	8.07246
	SPA	Sph	S1P	C24.Cer	C20.Cer	C18.Cer	C16.Cer	C14.Cer	C18.1.Cer	C22.Cer	C24.1.Cer
Max Total	0.40887	0.926604	6.3136	33.9724	2.18737	1.87842	8.09424	0.410887	0.189742	13.817	27.7646
0	0.39641	0.907239	3.72261	28.2597	2.18737	1.87842	7.86228	0.263148	0.189742	9.86291	22.9147
1	0.40887	0.926604	6.3136	33.9724	2.17027	1.67743	8.09424	0.410887	0.184706	13.817	27.7646
	SPA	Sph	S1P	C24.Cer	C20.Cer	C18.Cer	C16.Cer	C14.Cer	C18.1.Cer	C22.Cer	C24.1.Cer
Mean Total	0.20884	0.493764	2.0759	17.8988	1.24519	0.976398	4.7774	0.139393	0.116627	7.26214	15.5344
0	0.224648	0.530285	1.66198	19.0769	1.23441	0.943698	4.63692	0.145657	0.119797	7.10465	14.8762
1	0.194086	0.459677	2.46223	16.7992	1.25525	1.00692	4.90851	0.133547	0.113669	7.40913	16.1487
	SPA	Sph	S1P	C24.Cer	C20.Cer	C18.Cer	C16.Cer	C14.Cer	C18.1.Cer	C22.Cer	C24.1.Cer
StdErr Total	0.020782	0.0392572	0.27151	1.38623	0.09881	0.0752933	0.27925	0.0133608	0.00852286	0.587608	1.0202
0	0.0319371	0.0619275	0.198251	1.40786	0.115034	0.0978905	0.385344	0.0158617	0.0107654	0.582037	1.10903
1	0.0274553	0.049633	0.478432	2.35236	0.162075	0.116094	0.412663	0.0216134	0.0133841	1.01897	1.70372
	0	control group
	1	study group
