# Supplementary material for: Sphingolipids as a new factor in the pathomechanism of preeclampsia – Mass spectrometry analysis
Source: PLoS One. 2017 May 19;12(5):e0177601. doi: 10.1371/journal.pone.0177601 (PMC5438119; doi:10.1371/journal.pone.0177601)
Supplement: S5 File — (XLSX) [file pone.0177601.s005.xlsx]

## Sheet: ANOVA__PLYTKI_FR
S5 File - ANOVA analysis of results in platelets fraction.
platelet fraction		results in ng/100ul(in manuscript results are postcalculated to nmol/L
	SPA	Sph	S1P	C24.Cer	C20.Cer*	C18.Cer	C16.Cer*	C14.Cer*	C18.1.Cer	C22.Cer*	C24.1.Cer*
P-value	0.97636	0.568106	0.960385	0.312108	0.85962	0.918656	0.971773	0.696997	0.733312	0.546631	0.595066
	SPA	Sph	S1P	C24.Cer	C20.Cer	C18.Cer	C16.Cer	C14.Cer	C18.1.Cer	C22.Cer	C24.1.Cer
Min Total	0.730087	1.70819	17.9671	6.95252	2.40313	1.39071	4.21812	0.0606046	0.173628	6.60914	5.5158
0	2.7498	7.12994	30.211	46.2335	19.5269	7.51221	22.3437	0.575715	0.659325	74.3692	51.5854
1	0.730087	1.70819	17.9671	6.95252	2.40313	1.39071	4.21812	0.0606046	0.173628	6.60914	5.5158
	SPA	Sph	S1P	C24.Cer	C20.Cer	C18.Cer	C16.Cer	C14.Cer	C18.1.Cer	C22.Cer	C24.1.Cer
Max Total	13.1731	53.1629	329.211	119.483	81.7287	42.7176	121.846	2.64814	3.29938	209.295	159.59
0	9.20923	53.1629	294.571	119.483	81.7287	31.7469	76.8161	1.25974	1.53906	209.295	159.59
1	13.1731	39.2499	329.211	111.167	66.4923	42.7176	121.846	2.64814	3.29938	141.332	107.193
	SPA	Sph	S1P	C24.Cer	C20.Cer	C18.Cer	C16.Cer	C14.Cer	C18.1.Cer	C22.Cer	C24.1.Cer
Mean Total	5.43572	20.26	134.157	64.733	36.0174	16.0309	43.4384	0.936839	1.12891	88.9271	79.4205
0	5.41409	22.3456	132.969	72.7072	38.203	15.7565	44.348	0.834754	1.07253	103.621	91.0458
1	5.44903	18.9765	134.887	59.8258	34.6725	16.1998	42.8786	0.999661	1.16362	79.8849	72.2665
	SPA	Sph	S1P	C24.Cer	C20.Cer	C18.Cer	C16.Cer	C14.Cer	C18.1.Cer	C22.Cer	C24.1.Cer
StdErr Total	0.622316	2.52108	17.522	6.52331	4.03549	2.16169	5.50586	0.13436	0.148932	9.58474	7.65017
0	0.696821	5.00979	30.8969	8.31668	6.99431	2.99268	7.04933	0.0739432	0.123341	16.1842	13.846
1	0.93184	2.78246	21.9953	9.19077	5.08801	3.05935	7.98178	0.213956	0.232363	11.6372	8.80638
	0	control group
	1	study group
